# Supplementary material for: A shared inflammatory signature across severe malaria syndromes manifested by transcriptomic, proteomic and metabolomic analyses
Source: Springer Nature journal article supplement (doi:10.1038/s41467-025-59281-5), 2025-05-18
Supplement: MOESM1 [file 41467_2025_59281_MOESM1_ESM.pdf]

## Supplementary Information

### **A shared inflammatory signature across severe malaria syndromes manifested by transcriptomic, proteomic and metabolomic analyses**

Rafal S. Sobota<sup>1,2</sup>, Emily M. Stucke<sup>1</sup>, Drissa Coulibaly<sup>3</sup>, Jonathan G. Lawton<sup>1</sup>, Bryan E. Cummings<sup>1</sup>, Savy Sebastian<sup>1</sup>, Antoine Dara<sup>3</sup>, James B. Munro<sup>4</sup>, Amed Ouattara<sup>1</sup>, Abdoulaye K. Kone<sup>3</sup>, Bourama Kane<sup>3</sup>, Karim Traoré<sup>3</sup>, Bouréima Guindo<sup>3</sup>, Bourama M. Tangara<sup>3</sup>, Amadou Niangaly<sup>3</sup>, Noah T. Ventimiglia<sup>1</sup>, Modibo Daou<sup>3</sup>, Issa Diarra<sup>3</sup>, Youssouf Tolo<sup>3</sup>, Mody Sissoko<sup>3</sup>, Fayçal Maiga<sup>3</sup>, Aichatou Diawara<sup>3</sup>, Amidou Traore<sup>3</sup>, Ali Thera<sup>3</sup>, Matthew B. Laurens<sup>1</sup>, Kirsten E. Lyke<sup>1</sup>, Bourema Kouriba<sup>3</sup>, Ogobara K. Doumbo<sup>3</sup>, Christopher V. Plowe<sup>1</sup>, David R. Goodlett<sup>5</sup>, Joana C. Silva<sup>4</sup>, Mahamadou A. Thera<sup>3</sup>, Mark A. Travassos<sup>1</sup>

Corresponding author: Mark A. Travassos, MD, MSc, University of Maryland School of Medicine, 685 West Baltimore Street, Room 480, Baltimore, MD 21201, mtravass@som.umaryland.edu, (410) 706-8695.

#### Affiliations:

<sup>1</sup>Malaria Research Program, Center for Vaccine Development and Global Health, University of Maryland School of Medicine; Baltimore, Maryland, United States of America.

<sup>2</sup>Ken and Ruth Davee Department of Neurology, Northwestern University; Chicago, Illinois, United States of America.

<sup>3</sup>Malaria Research and Training Center, University of Sciences, Techniques and Technologies; Bamako, Mali.

<sup>4</sup>Institute for Genome Sciences, University of Maryland School of Medicine, Baltimore, MD, USA

<sup>5</sup>Department of Biochemistry and Microbiology, University of Victoria; Victoria, BC, Canada.

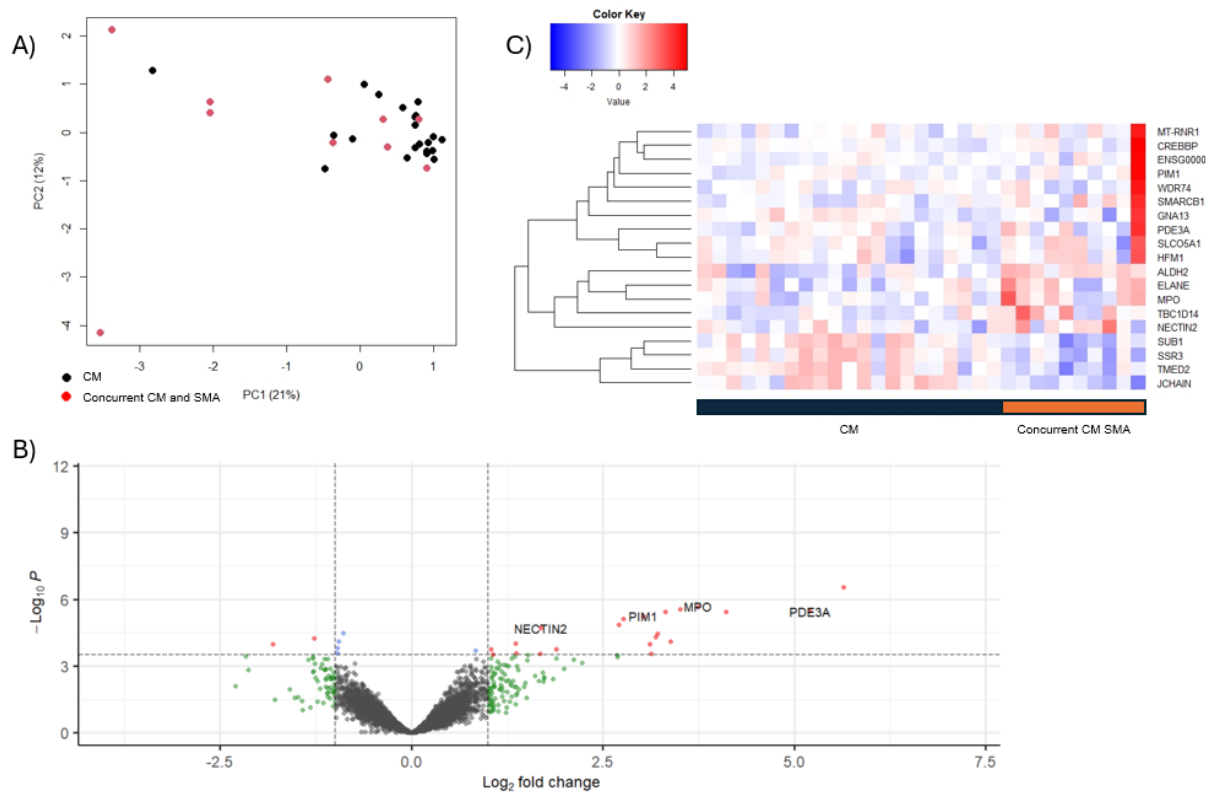

Supplemental Figure 1. Differential gene expression analysis comparing cerebral malaria to concurrent cerebral malaria and severe malarial anemia. A) Principal component analysis showing the separation of CM from concurrent CM and SMA along the first two principal components. B) Volcano plot showing the significance of association from a quasi-likelihood F test based on the negative binomial distribution (red and blue FDR adjusted p-value < 0.05) and effect size (green and red > 1 absolute log<sub>2</sub>-fold change). C) Heatmap of differentially expressed transcripts showing the clustering of associating genes from a quasi-likelihood F test (y-axis).

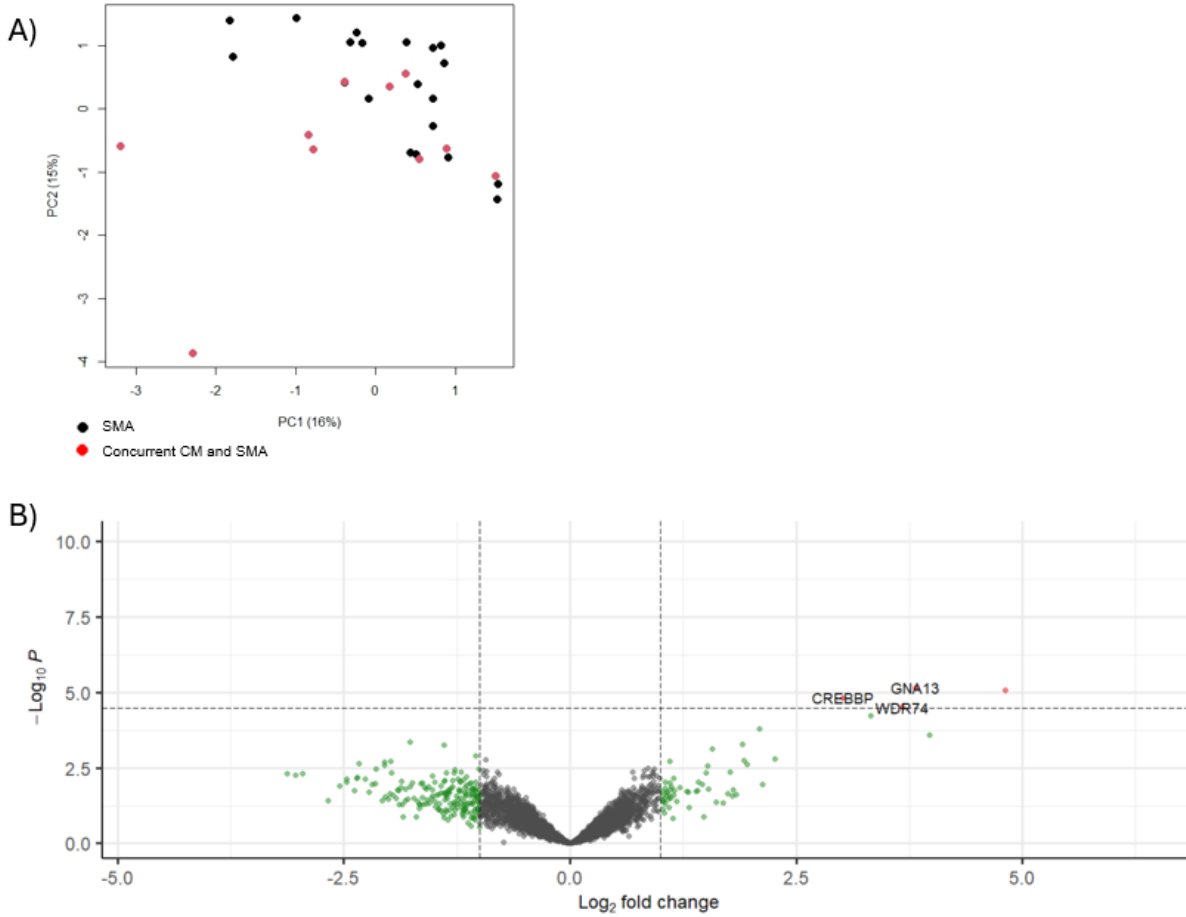

Supplemental Figure 2. Differential gene expression analysis comparing severe malarial anemia to concurrent cerebral malaria and severe malarial anemia. A) Principal component analysis showing the separation of SMA from concurrent CM and SMA along the first two principal components. B) Volcano plot showing significance of association from a quasi-likelihood F test based on the negative binomial distribution (red FDR adjusted p-value < 0.05) and effect size (green and red > 1 absolute log<sub>2</sub>-fold change).

A)

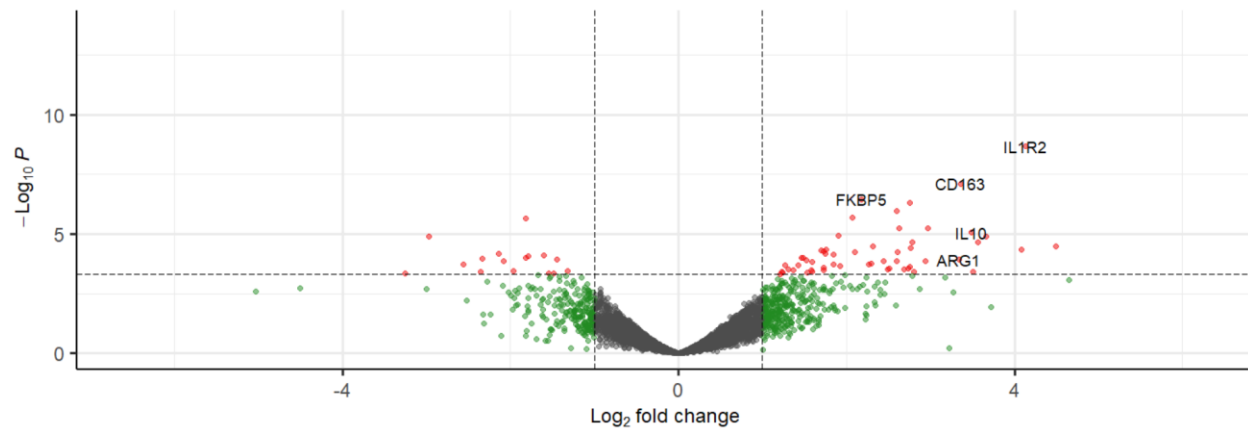

B)

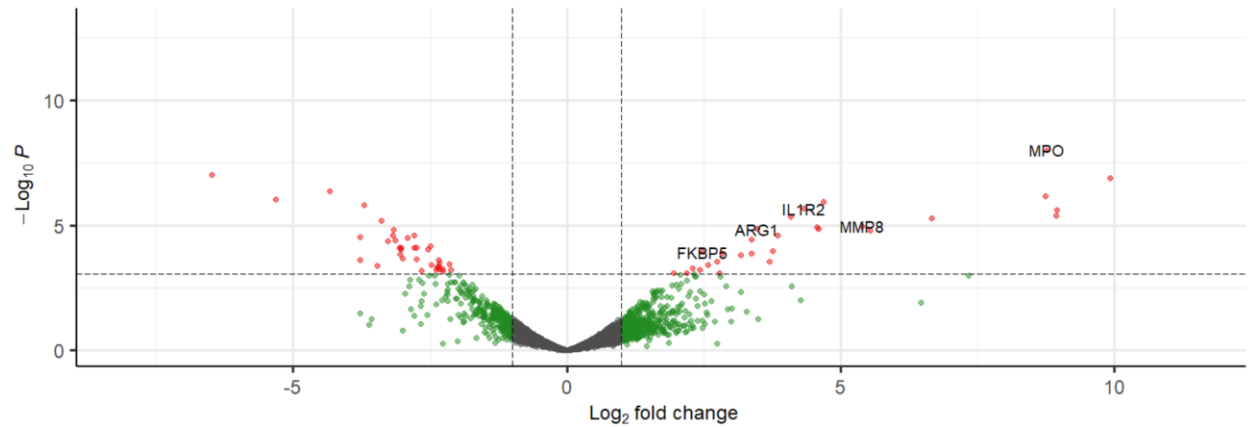

Supplemental Figure 3. Volcano plots showing the significance of association assessed with a two-tailed paired t test (red FDR adjusted p-value  $< 0.05$ ) and effect size (green and red  $> 1$  absolute  $\log_2$ -fold change) in transcriptome comparisons of A) cerebral malaria to uncomplicated malaria controls with a history of cerebral malaria and B) concurrent cerebral malaria and severe malarial anemia to uncomplicated malaria controls with a history of cerebral malaria.

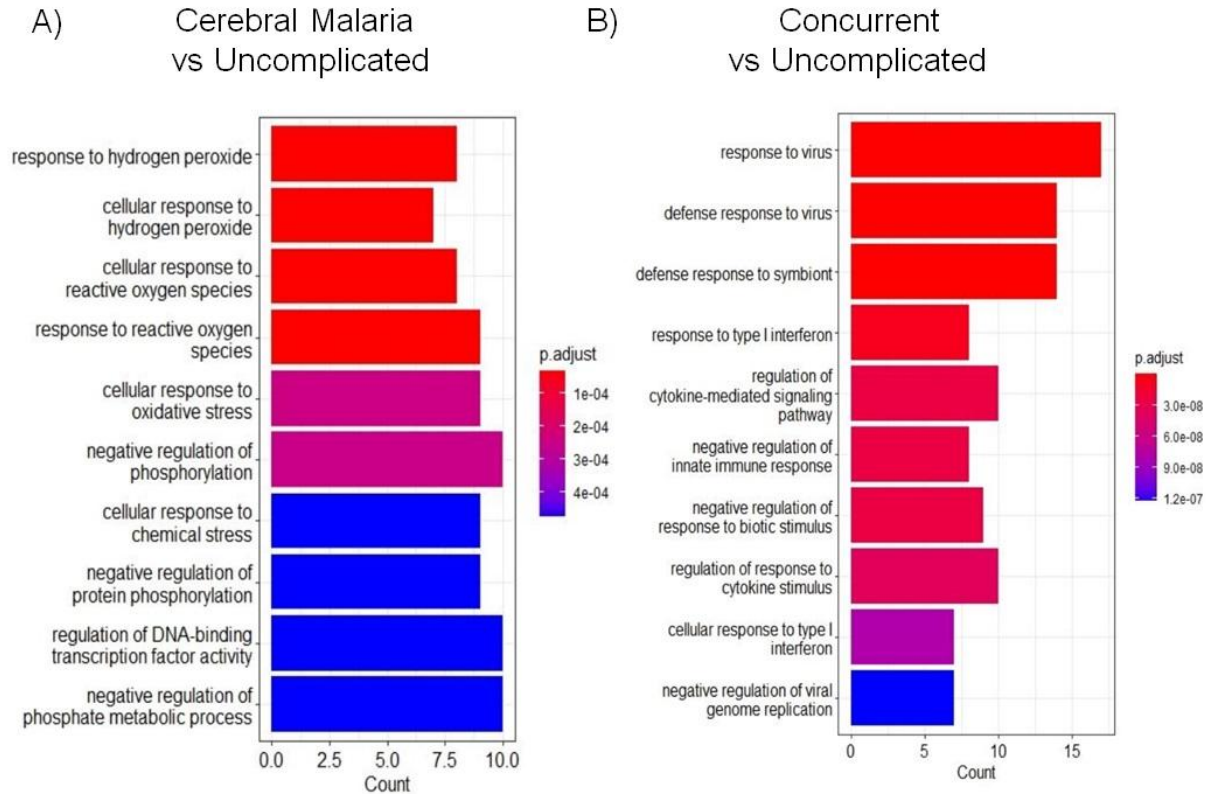

Supplemental Figure 4. Bar plots of gene counts in the top 10 gene ontology biological processes associating in transcriptome comparisons. Enrichment analysis was performed using the clusterProfiler package in R. Enriched terms were determined using a hypergeometric test, with p values <0.05 considered significant. Pathway names are represented on the Y-axis, and gene counts on the X-axis. Color spectrum represents the extent of statistical association. A) cerebral malaria, and B) concurrent cerebral malaria and severe malarial anemia, are compared to uncomplicated malaria controls with a history of cerebral malaria

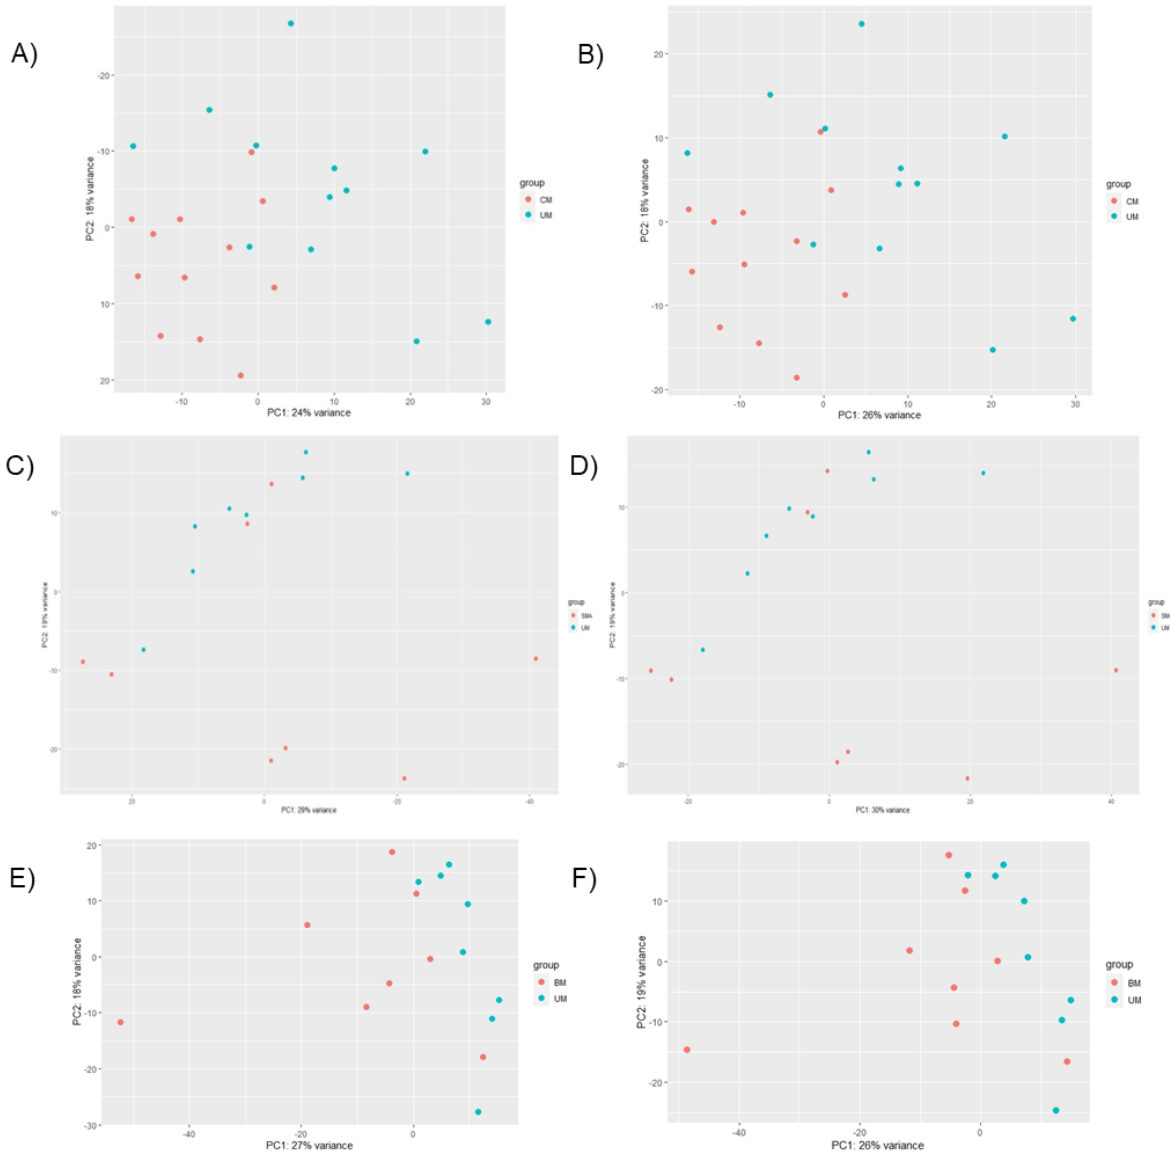

Supplemental Figure 5. Principle component analyses of gene expression counts with and without adjustment for cell proportions. A) Cerebral malaria versus controls without a history of CM, unadjusted. B) Cerebral malaria versus controls without a history of CM, adjusted for B cell, T cell, and neutrophil proportions. C) Severe malarial anemia versus controls without a history of CM, unadjusted. D) Severe malarial anemia versus controls without a history of CM, adjusted for B cell, T cell, and neutrophil proportions. E) Concurrent cerebral malaria and severe malarial anemia (BM) versus controls without a history of CM (UM), unadjusted. F) Concurrent cerebral malaria and severe malarial anemia (BM) versus controls without a history of CM (UM), adjusted for B cell, T cell, and neutrophil proportions

Supplemental Table 1. Top 20 transcripts with the most significant association from differential gene expression analyses between CM in comparison to controls without a history of CM. Significance of association was assessed with a quasi-likelihood F test based on the negative binomial distribution. False discovery rate was used to correct for multiple testing.

| Gene            | logFC | logCPM | p value  | FDR      |
|-----------------|-------|--------|----------|----------|
| IL1R2           | 4.41  | 8.73   | 2.09E-15 | 1.75E-11 |
| FKBP5           | 2.58  | 7.72   | 4.76E-13 | 2.00E-09 |
| MMP8            | 4.20  | 5.11   | 9.75E-12 | 2.73E-08 |
| CD163           | 4.13  | 5.49   | 2.23E-11 | 4.68E-08 |
| MMP9            | 2.04  | 7.79   | 6.13E-10 | 1.03E-06 |
| OLFM4           | 4.48  | 4.32   | 5.55E-09 | 7.77E-06 |
| IL1R1           | 2.11  | 5.81   | 1.37E-08 | 1.64E-05 |
| IL18R1          | 2.61  | 6.35   | 2.11E-08 | 2.22E-05 |
| IRAK3           | 1.66  | 8.01   | 3.74E-08 | 3.42E-05 |
| ADARB1          | -1.60 | 7.17   | 4.07E-08 | 3.42E-05 |
| SPATC1          | 2.99  | 4.50   | 5.43E-08 | 4.15E-05 |
| SAMSN1          | 2.35  | 6.29   | 4.16E-07 | 2.68E-04 |
| ZDHHC20         | 1.62  | 6.01   | 4.46E-07 | 2.68E-04 |
| RBM33           | -1.38 | 8.29   | 4.47E-07 | 2.68E-04 |
| TNFRSF25        | -1.37 | 6.49   | 5.38E-07 | 3.01E-04 |
| FGD4            | 1.60  | 5.87   | 6.42E-07 | 3.05E-04 |
| ENSG00000254420 | 2.69  | 4.76   | 6.56E-07 | 3.05E-04 |
| KCNE1           | 2.42  | 7.43   | 6.85E-07 | 3.05E-04 |
| TRIB1           | 2.15  | 4.70   | 6.89E-07 | 3.05E-04 |
| SLCO4A1         | 2.41  | 4.48   | 8.40E-07 | 3.53E-04 |

Supplemental Table 2. Gene Ontology biological processes with the strongest associations when comparing gene expression between CM versus uncomplicated controls without a history of CM. Statistical significance was assessed using a one-sided hypergeometric test. P values were adjusted for multiple testing using the Benjamini-Hochberg method.

| Term for biological process                                                                                               | Gene Ratio | Adjusted p value |
|---------------------------------------------------------------------------------------------------------------------------|------------|------------------|
| T cell activation                                                                                                         | 33/365     | 2.19E-06         |
| Positive regulation of cytokine production                                                                                | 31/365     | 4.16E-06         |
| Regulation of immune effector process                                                                                     | 26/365     | 4.16E-06         |
| Leukocyte mediated immunity                                                                                               | 29/365     | 9.89E-06         |
| Immune response-regulating signaling pathway                                                                              | 30/365     | 9.89E-06         |
| Regulation of T cell activation                                                                                           | 24/365     | 2.08E-05         |
| Adaptive immune response based on somatic recombination of immune receptors built from Immunoglobulin superfamily domains | 25/365     | 2.08E-05         |
| Negative regulation of immune system process                                                                              | 27/365     | 6.23E-05         |
| Lipopolysaccharide-mediated signaling pathway                                                                             | 10/365     | 8.82E-05         |
| Negative regulation of immune effector process                                                                            | 13/365     | 8.82E-05         |



Supplemental Table 3. Upregulated KEGG pathways significantly associated with transcription in CM compared to controls with uncomplicated disease without history of CM. Statistical significance was assessed using a one-sided hypergeometric test.

| Pathway                                           | total | upregulated | p value  |
|---------------------------------------------------|-------|-------------|----------|
| Chemical carcinogenesis - reactive oxygen species | 110   | 9           | 4.01E-03 |
| Regulation of actin cytoskeleton                  | 91    | 7           | 0.015    |
| Focal adhesion                                    | 92    | 7           | 0.016    |
| Calcium signaling pathway                         | 117   | 8           | 0.018    |
| Human papillomavirus infection                    | 145   | 9           | 0.022    |
| Other types of O-glycan biosynthesis              | 9     | 2           | 0.025    |
| Arrhythmogenic right ventricular cardiomyopathy   | 41    | 4           | 0.028    |
| Circadian rhythm                                  | 12    | 2           | 0.044    |

Supplemental Table 4. Transcripts significant association from differential gene expression analyses between SMA in comparison to controls without a history of CM. Significance of association was assessed with a quasi-likelihood F test based on the negative binomial distribution, and false discovery rate was used to correct for multiple testing.

| Gene    | logFC | logCPM | p value  | FDR      |
|---------|-------|--------|----------|----------|
| DAAM2   | 4.83  | 4.37   | 1.88E-07 | 1.54E-03 |
| LTF     | 3.87  | 6.59   | 5.74E-07 | 2.36E-03 |
| ARG1    | 2.82  | 6.24   | 1.81E-06 | 4.97E-03 |
| THSD4   | 4.35  | 5.33   | 4.41E-06 | 8.95E-03 |
| PRTN3   | 6.01  | 3.98   | 6.06E-06 | 8.95E-03 |
| AZU1    | 4.62  | 4.37   | 6.53E-06 | 8.95E-03 |
| LCN2    | 3.52  | 5.63   | 8.20E-06 | 9.63E-03 |
| IL1R2   | 3.02  | 8.85   | 1.39E-05 | 0.014    |
| ZBTB16  | 2.72  | 4.75   | 1.59E-05 | 0.014    |
| TPST1   | 2.96  | 5.20   | 2.82E-05 | 0.021    |
| PRKG1   | 3.94  | 5.86   | 2.95E-05 | 0.021    |
| MMP8    | 2.96  | 5.07   | 3.37E-05 | 0.021    |
| IRS2    | 1.91  | 5.65   | 3.49E-05 | 0.021    |
| TMEM204 | -2.18 | 4.79   | 3.52E-05 | 0.021    |
| FKBP5   | 1.74  | 8.03   | 5.31E-05 | 0.028    |
| SPTA1   | 5.00  | 3.61   | 5.53E-05 | 0.028    |
| CHN2    | 2.05  | 5.29   | 6.44E-05 | 0.031    |
| MYC     | -1.63 | 6.26   | 7.66E-05 | 0.035    |
| OAS3    | -2.02 | 7.04   | 1.04E-04 | 0.045    |

Supplemental Table 5. Gene Ontology biological processes with the strongest associations when comparing gene expression between SMA versus uncomplicated controls without a history of CM. Statistical significance was assessed using a one-sided hypergeometric test. P values were adjusted for multiple testing using the Benjamini-Hochberg method.

| Term for biological process                                         | Gene Ratio | Adjusted p value |
|---------------------------------------------------------------------|------------|------------------|
| Negative regulation of cytokine production                          | 5/19       | 6.56E-03         |
| Tumor necrosis factor production                                    | 4/19       | 6.56E-03         |
| Regulation of tumor necrosis factor production                      | 4/19       | 6.56E-03         |
| Tumor necrosis factor superfamily cytokine production               | 4/19       | 6.56E-03         |
| Regulation of tumor necrosis factor superfamily cytokine production | 4/19       | 6.56E-03         |
| Killing of cells of other organism                                  | 3/19       | 7.16E-03         |
| Neutrophil-mediated killing of symbiont cell                        | 2/19       | 8.08E-03         |
| Negative regulation of cytokine-mediated signaling pathway          | 3/19       | 8.08E-03         |
| Iron ion homeostasis                                                | 3/19       | 8.08E-03         |
| Negative regulation of response to cytokine stimulus                | 3/19       | 8.08E-03         |

Supplemental Table 6. Upregulated KEGG pathways significantly associated with transcription in SMA compared to controls with uncomplicated disease without history of CM. Statistical significance was assessed using a one-sided hypergeometric test.

| Pathway                                     | total | upregulated | p value  |
|---------------------------------------------|-------|-------------|----------|
| Vitamin B6 metabolism                       | 2     | 1           | 3.89E-03 |
| Valine, leucine and isoleucine biosynthesis | 3     | 1           | 5.83E-03 |
| Nicotinate and nicotinamide metabolism      | 4     | 1           | 7.77E-03 |
| Metabolic pathways                          | 498   | 4           | 0.014    |
| Glycine, serine and threonine metabolism    | 16    | 1           | 0.031    |
| Arachidonic acid metabolism                 | 16    | 1           | 0.031    |
| Tryptophan metabolism                       | 19    | 1           | 0.036    |
| Retinol metabolism                          | 20    | 1           | 0.038    |
| Cysteine and methionine metabolism          | 21    | 1           | 0.040    |
| Valine, leucine and isoleucine degradation  | 22    | 1           | 0.042    |
| Tyrosine metabolism                         | 22    | 1           | 0.042    |
| Inositol phosphate metabolism               | 26    | 1           | 0.049    |

Supplemental Table 7. Top 20 transcripts with the most significant association from differential gene expression analyses between concurrent CM and SMA in comparison to controls without a history of CM. Significance of association was assessed with a quasi-likelihood F test based on the negative binomial distribution. False discovery rate was used to correct for multiple testing.

| Gene       | logFC | logCPM | p value  | FDR      |
|------------|-------|--------|----------|----------|
| OLFM4      | 6.90  | 5.77   | 2.79E-09 | 1.75E-05 |
| XAF1       | -2.39 | 7.44   | 1.95E-06 | 2.77E-03 |
| IL1R2      | 4.04  | 8.71   | 2.04E-06 | 2.77E-03 |
| DEFA1      | 5.01  | 5.27   | 2.11E-06 | 2.77E-03 |
| PER1       | 2.88  | 5.50   | 2.44E-06 | 2.77E-03 |
| IL1R1      | 3.07  | 6.29   | 2.65E-06 | 2.77E-03 |
| PRTN3      | 6.28  | 5.50   | 4.88E-06 | 4.14E-03 |
| MMP9       | 2.84  | 8.70   | 5.29E-06 | 4.14E-03 |
| PFKFB2     | 2.87  | 5.10   | 5.99E-06 | 4.17E-03 |
| GYG1       | 2.05  | 6.57   | 8.10E-06 | 5.08E-03 |
| AATBC      | -3.11 | 5.74   | 9.10E-06 | 5.19E-03 |
| FKBP5      | 2.21  | 7.66   | 1.19E-05 | 6.24E-03 |
| EDIL3      | 6.44  | 5.82   | 1.31E-05 | 6.31E-03 |
| ZDHHC20    | 2.04  | 6.06   | 1.61E-05 | 7.19E-03 |
| ISG15      | -2.23 | 5.95   | 2.11E-05 | 8.80E-03 |
| ZBP1       | -1.86 | 6.69   | 2.27E-05 | 8.90E-03 |
| OAS3       | -2.33 | 6.38   | 2.80E-05 | 0.010    |
| MX1        | -1.81 | 6.84   | 3.48E-05 | 0.012    |
| ST6GALNAC3 | 2.84  | 4.87   | 3.81E-05 | 0.013    |
| RBFOX1     | 6.14  | 5.47   | 4.47E-05 | 0.013    |

Supplemental Table 8. Gene Ontology biological processes with the strongest associations when comparing gene expression between concurrent CM and SMA versus uncomplicated controls without a history of CM. Statistical significance was assessed using a one-sided hypergeometric test. P values were adjusted for multiple testing using the Benjamini-Hochberg method.

| Term for biological process                       | Gene Ratio | Adjusted p value |
|---------------------------------------------------|------------|------------------|
| Response to virus                                 | 14/63      | 2.35E-08         |
| Defense response to virus                         | 11/63      | 6.16E-07         |
| Defense response to symbiont                      | 11/63      | 6.16E-07         |
| Negative regulation of immune response            | 9/63       | 6.47E-06         |
| Regulation of cytokine-mediated signaling pathway | 8/63       | 1.04E-05         |
| Response to type I interferon                     | 6/63       | 1.04E-05         |
| Cytokine-mediated signaling pathway               | 12/63      | 1.05E-05         |
| Regulation of response to cytokine stimulus       | 8/63       | 1.32E-05         |
| Negative regulation of innate immune response     | 6/63       | 2.36E-05         |
| Positive regulation of interferon-beta production | 5/63       | 2.99E-05         |

Supplemental Table 9. KEGG pathways significantly associated with transcription in concurrent CM and SMA compared to controls with uncomplicated disease without history of CM. Statistical significance was assessed using a one-sided hypergeometric test.

A. Upregulated pathways in the comparison of concurrent CM and SMA cases to controls without a history of CM

| Pathway                          | total | upregulated | p value |
|----------------------------------|-------|-------------|---------|
| Pancreatic secretion             | 40    | 2           | 0.028   |
| Ubiquitin mediated proteolysis   | 42    | 2           | 0.030   |
| Vitamin digestion and absorption | 7     | 1           | 0.045   |

B. Downregulated pathway in the comparison of concurrent CM and SMA cases to controls without a history of CM

| Pathway     | total | downregulated | p value |
|-------------|-------|---------------|---------|
| Necroptosis | 52    | 2             | 0.019   |

Supplemental Table 10. Demographic data for controls with and without a history of CM. \* denotes mean (standard deviation). Statistical significance assessed using a two-tailed t-test.

|                                     | Controls w/ hx of SM | Controls w/o hx of SM | p value |
|-------------------------------------|----------------------|-----------------------|---------|
| n                                   | 16                   | 16                    |         |
| Female                              | 8                    | 8                     |         |
| Age* (yrs)                          | 3.39 (1.04)          | 3.33 (0.97)           | 0.82    |
| Parasitemia*<br>(parasite/ $\mu$ L) | 37764 (63118)        | 22076 (40138)         | 0.42    |
| BCS                                 |                      |                       | 0.80    |
| 5                                   | 16                   | 16                    |         |
| Hgb* (g/dL)                         | 9.34 (1.56)          | 9.19 (1.19)           |         |



Supplemental Table 11. Top 20 significantly associated transcripts expressed at a higher level in SMA than CM. Significance of association was assessed with a quasi-likelihood F test based on the negative binomial distribution. False discovery rate was used to correct for multiple testing.

| Gene    | logFC | logCPM | p value  | FDR      |
|---------|-------|--------|----------|----------|
| H1-2    | 1.86  | 6.69   | 6.52E-08 | 4.15E-04 |
| H1-0    | 2.37  | 6.25   | 9.97E-07 | 1.55E-03 |
| SLC2A1  | 2.96  | 7.85   | 1.35E-06 | 1.55E-03 |
| RHCE    | 3.33  | 6.23   | 1.15E-06 | 1.55E-03 |
| RHD     | 4.10  | 6.64   | 1.24E-06 | 1.55E-03 |
| SLC6A19 | 5.28  | 7.93   | 1.46E-06 | 1.55E-03 |
| ACP5    | 2.11  | 6.68   | 1.88E-06 | 1.71E-03 |
| CARHSP1 | 1.06  | 6.33   | 3.84E-06 | 2.67E-03 |
| CCS     | 1.31  | 6.19   | 4.61E-06 | 2.67E-03 |
| MED25   | 1.43  | 6.29   | 5.46E-06 | 2.67E-03 |
| MAP3K20 | 1.77  | 5.62   | 5.43E-06 | 2.67E-03 |
| HMBS    | 2.17  | 5.91   | 4.20E-06 | 2.67E-03 |
| BSG     | 2.30  | 10.47  | 5.11E-06 | 2.67E-03 |
| NME4    | 1.08  | 5.22   | 9.51E-06 | 4.17E-03 |
| ANK1    | 2.63  | 7.24   | 9.80E-06 | 4.17E-03 |
| FIS1    | 1.56  | 7.40   | 1.18E-05 | 4.70E-03 |
| MYO7B   | 1.12  | 4.31   | 1.95E-05 | 6.06E-03 |
| UROD    | 1.41  | 5.59   | 1.96E-05 | 6.06E-03 |
| SLC1A5  | 2.38  | 7.18   | 1.69E-05 | 6.06E-03 |
| BMP2K   | 2.51  | 7.28   | 2.09E-05 | 6.06E-03 |

Supplemental Table 12. Top 20 significantly associated transcripts expressed at a higher level in CM than SMA. Significance of association was assessed with a quasi-likelihood F test based on the negative binomial distribution. False discovery rate was used to correct for multiple testing.

| Gene     | logFC | logCPM | p value  | FDR      |
|----------|-------|--------|----------|----------|
| GBP3     | -1.26 | 4.86   | 3.10E-05 | 8.06E-03 |
| H2BC21   | -1.31 | 4.90   | 3.61E-05 | 8.22E-03 |
| SELENOT  | -0.79 | 5.97   | 5.35E-05 | 9.47E-03 |
| ATP8B2   | -0.93 | 5.12   | 8.32E-05 | 0.013    |
| EDEM1    | -0.91 | 5.39   | 2.14E-04 | 0.020    |
| CCDC93   | -0.94 | 4.94   | 2.58E-04 | 0.023    |
| IL7R     | -0.82 | 7.02   | 2.92E-04 | 0.025    |
| TMEM123  | -0.75 | 6.70   | 3.02E-04 | 0.025    |
| TRIM25   | -1.00 | 7.80   | 3.68E-04 | 0.028    |
| ZNF101   | -0.73 | 5.20   | 4.03E-04 | 0.029    |
| PPT1     | -0.71 | 6.58   | 4.41E-04 | 0.031    |
| TMEM273  | -1.10 | 4.30   | 4.91E-04 | 0.033    |
| CNIH1    | -0.97 | 4.40   | 4.96E-04 | 0.033    |
| TAGAP    | -0.58 | 6.58   | 6.36E-04 | 0.038    |
| TMEM126B | -0.96 | 4.00   | 6.93E-04 | 0.039    |
| CD164    | -0.69 | 6.98   | 6.80E-04 | 0.039    |
| CACYBP   | -0.95 | 5.71   | 7.30E-04 | 0.040    |
| PATL1    | -0.84 | 4.93   | 7.77E-04 | 0.041    |
| HACD4    | -0.92 | 5.25   | 8.03E-04 | 0.041    |
| MORF4L2  | -0.78 | 4.93   | 8.49E-04 | 0.042    |

Supplemental Table 13. Gene Ontology biological processes with the strongest associations when comparing gene expression between CM versus SMA. Statistical significance was assessed using a one-sided hypergeometric test. P values were adjusted for multiple testing using the Benjamini-Hochberg method. This table corresponds to Figure 4D.

| Term for biological process                     | Gene Ratio | Adjusted p value |
|-------------------------------------------------|------------|------------------|
| Cellular response to toxic substance            | 10/159     | 2.22E-04         |
| Cellular oxidant detoxification                 | 9/159      | 2.22E-04         |
| Cellular detoxification                         | 9/159      | 4.86E-04         |
| Protoporphyrinogen IX metabolic process         | 4/159      | 8.94E-04         |
| Detoxification                                  | 9/159      | 2.62E-03         |
| Hydrogen peroxide catabolic process             | 5/159      | 2.62E-03         |
| Response to toxic substance                     | 11/159     | 4.92E-03         |
| Proteasomal protein catabolic process           | 15/159     | 5.45E-03         |
| Porphyrin-containing compound metabolic process | 5/159      | 0.015            |
| Erythrocyte differentiation                     | 7/159      | 0.017            |

Supplemental Table 14. KEGG pathways significantly associated with transcription in comparisons between severe malaria subtypes. Statistical significance was assessed using a one-sided hypergeometric test.

A. Upregulated pathways in SMA compared to CM

| Pathway                          | total | upregulated | p value  |
|----------------------------------|-------|-------------|----------|
| GABAergic synapse                | 38    | 4           | 8.56E-03 |
| Taste transduction               | 22    | 3           | 0.011    |
| Cortisol synthesis and secretion | 33    | 3           | 0.033    |
| Bile secretion                   | 34    | 3           | 0.036    |
| Endocytosis                      | 59    | 4           | 0.037    |
| Morphine addiction               | 36    | 3           | 0.041    |
| Pancreatic secretion             | 38    | 3           | 0.047    |
| Oxytocin signaling pathway       | 64    | 4           | 0.048    |

B. Upregulated pathways in CM compared to SMA

| Pathway                            | total | upregulated | p value |
|------------------------------------|-------|-------------|---------|
| Taurine and hypotaurine metabolism | 4     | 1           | 0.017   |
| Citrate cycle (TCA cycle)          | 12    | 1           | 0.052   |

Supplemental Table 15. Top 20 significantly associated transcripts in differential expression analysis of CM versus concurrent CM and SMA. Significance of association was assessed with a quasi-likelihood F test based on the negative binomial distribution. False discovery rate was used to correct for multiple testing.

| Gene            | logFC | logCPM | p value  | FDR      |
|-----------------|-------|--------|----------|----------|
| ENSG00000258486 | 5.64  | 11.17  | 2.97E-07 | 2.03E-03 |
| MPO             | 3.75  | 6.68   | 2.10E-06 | 4.21E-03 |
| SMARCB1         | 3.51  | 8.69   | 2.77E-06 | 4.21E-03 |
| PDE3A           | 5.20  | 8.82   | 3.52E-06 | 4.21E-03 |
| CREBBP          | 3.32  | 8.76   | 3.62E-06 | 4.21E-03 |
| WDR74           | 4.11  | 7.09   | 3.70E-06 | 4.21E-03 |
| PIM1            | 3.03  | 9.57   | 5.81E-06 | 5.66E-03 |
| TBC1D14         | 2.77  | 9.24   | 7.71E-06 | 6.58E-03 |
| MT-RNR1         | 2.71  | 9.93   | 1.37E-05 | 0.010    |
| NECTIN2         | 1.69  | 5.45   | 1.95E-05 | 0.013    |
| SUB1            | -0.89 | 7.10   | 3.24E-05 | 0.020    |
| ELANE           | 3.22  | 5.81   | 3.45E-05 | 0.020    |
| HFM1            | 3.19  | 12.47  | 4.91E-05 | 0.026    |
| SSR3            | -1.27 | 5.94   | 5.69E-05 | 0.028    |
| SLCO5A1         | 3.39  | 10.04  | 7.69E-05 | 0.034    |
| TMED2           | -0.95 | 6.19   | 8.06E-05 | 0.034    |
| ALDH2           | 1.36  | 5.10   | 9.58E-05 | 0.038    |
| GNA13           | 3.11  | 7.43   | 0.000103 | 0.038    |
| JCHAIN          | -1.82 | 9.77   | 0.000105 | 0.038    |

Supplemental Table 16. KEGG pathways significantly associated with transcription in comparisons between severe malaria subtypes. Statistical significance was assessed using a one-sided hypergeometric test.

A. Upregulated pathways in concurrent CM and SMA compared to CM alone

| Pathway                                                  | total | upregulated | p value  |
|----------------------------------------------------------|-------|-------------|----------|
| TGF-beta signaling pathway                               | 36    | 2           | 2.72E-03 |
| Signaling pathways regulating pluripotency of stem cells | 49    | 2           | 5.00E-03 |
| Apelin signaling pathway                                 | 50    | 2           | 5.20E-03 |
| Steroid biosynthesis                                     | 9     | 1           | 0.020    |
| Cytokine-cytokine receptor interaction                   | 103   | 2           | 0.021    |
| Porphyrin metabolism                                     | 13    | 1           | 0.028    |
| Olfactory transduction                                   | 19    | 1           | 0.041    |
| Mineral absorption                                       | 23    | 1           | 0.049    |

B. Upregulated pathways in CM compared to concurrent CM and SMA

| Pathway                                             | total | upregulated | p value  |
|-----------------------------------------------------|-------|-------------|----------|
| Vibrio cholerae infection                           | 14    | 1           | 8.19E-03 |
| Pancreatic secretion                                | 40    | 1           | 0.023    |
| GnRH signaling pathway                              | 42    | 1           | 0.024    |
| Salivary secretion                                  | 45    | 1           | 0.026    |
| TNF signaling pathway                               | 48    | 1           | 0.028    |
| Parathyroid hormone synthesis, secretion and action | 54    | 1           | 0.031    |

Supplemental Table 17. Significantly associated transcripts in differential expression analysis of SMA versus concurrent CM and SMA. Significance of association was assessed with a quasi-likelihood F test based on the negative binomial distribution.

| Gene            | logFC | logCPM | p value  | FDR   |
|-----------------|-------|--------|----------|-------|
| GNA13           | 3.82  | 7.12   | 6.92E-06 | 0.025 |
| ENSG00000258486 | 4.81  | 11.00  | 8.28E-06 | 0.025 |
| CREBBP          | 3.02  | 8.61   | 1.51E-05 | 0.031 |
| WDR74           | 3.67  | 7.01   | 3.16E-05 | 0.049 |

Supplemental Table 18. Upregulated KEGG pathways in comparing concurrent CM and SMA compared to SMA alone. Statistical significance was assessed using a one-sided hypergeometric test.

| Pathway                                                  | total | upregulated | p value  |
|----------------------------------------------------------|-------|-------------|----------|
| Steroid biosynthesis                                     | 8     | 1           | 5.19E-03 |
| TGF-beta signaling pathway                               | 35    | 1           | 0.023    |
| Morphine addiction                                       | 35    | 1           | 0.023    |
| Signaling pathways regulating pluripotency of stem cells | 45    | 1           | 0.029    |
| Estrogen signaling pathway                               | 60    | 1           | 0.038    |



Supplemental Table 19. Demographic data for the study participants in proteomic analyses for CM versus controls without a history of CM. \* denotes mean (standard deviation). Statistical significance assessed using a two-tailed t-test.

|                                     | Cases              | Controls      | p value |
|-------------------------------------|--------------------|---------------|---------|
| n                                   | 14                 | 14            |         |
| Female                              | 8                  | 8             |         |
| Age* (yrs)                          | 2.56 (1.22)        | 2.93 (1.12)   | 0.45    |
| Parasitemia*<br>(parasite/ $\mu$ L) | 107330<br>(132947) | 28670 (46454) | 0.039   |
| BCS                                 |                    |               |         |
| 5                                   | 0                  | 14            |         |
| 2                                   | 11                 | 0             |         |
| 1                                   | 3                  | 0             |         |
| Hgb* (g/dL)                         | 8.06 (2.02)        | 8.62 (1.82)   | 0.36    |

Supplemental Table 20. Protein upregulated in CM versus controls without a history of CM. Statistical significance assessed with a two-tailed paired t test, using an alpha level of 0.05.

| Gene      | p value  | LogFC |
|-----------|----------|-------|
| TIMP1     | 1.71E-03 | 1.80  |
| CD14      | 2.00E-03 | 0.64  |
| CAT       | 2.70E-03 | 1.83  |
| LBP       | 3.62E-03 | 1.25  |
| ACTBL2    | 3.70E-03 | 1.75  |
| HSP90B1   | 5.23E-03 | 0.70  |
| SERPINF1  | 5.70E-03 | 0.38  |
| VCAM1     | 6.15E-03 | 0.65  |
| VASN      | 6.49E-03 | 0.73  |
| SERPINA3  | 7.60E-03 | 1.08  |
| CPN1      | 0.010    | 0.50  |
| ICAM1     | 0.014    | 1.61  |
| ACTA1     | 0.016    | 1.76  |
| ACTB      | 0.017    | 2.19  |
| LCP1      | 0.017    | 1.05  |
| SERPINA10 | 0.019    | 0.70  |
| LILRA3    | 0.019    | 0.53  |
| ENPP2     | 0.019    | 0.80  |
| PRG4      | 0.024    | 0.83  |
| A1BG      | 0.025    | 0.22  |
| LGALS3BP  | 0.026    | 0.57  |
| LRG1      | 0.035    | 0.55  |
| FCN2      | 0.037    | 1.01  |
| F9        | 0.038    | 0.70  |
| GC        | 0.042    | 0.26  |
| VWF       | 0.046    | 0.74  |
| ITIH3     | 0.046    | 0.49  |
| SERPING1  | 0.047    | 0.44  |

Supplemental Table 21. Protein downregulated in CM versus controls without a history of CM. Statistical significance assessed with a two-tailed paired t test, using an alpha level of 0.05.

| Gene     | p value  | LogFC |
|----------|----------|-------|
| SERPIND1 | 1.65E-03 | -0.55 |
| APOM     | 1.99E-03 | -1.03 |
| PLG      | 3.26E-03 | -0.23 |
| THBS1    | 4.67E-03 | -1.47 |
| PPBP     | 5.55E-03 | -1.13 |
| C3       | 9.24E-03 | -0.47 |
| PF4      | 0.011    | -1.01 |
| CFP      | 0.013    | -0.78 |
| C1QB     | 0.020    | -0.55 |
| TTR      | 0.020    | -0.43 |
| GSN      | 0.027    | -0.37 |
| MBL2     | 0.039    | -0.95 |
| LUM      | 0.039    | -0.49 |
| HRG      | 0.045    | -0.28 |
| SHBG     | 0.048    | -0.48 |

Supplemental Table 22. Gene Ontology biological processes of protein upregulated in CM versus controls with uncomplicated malaria and no history of CM. Statistical significance was assessed using a one-sided hypergeometric test.

| Term for biological process                     | total | upregulated | p value  |
|-------------------------------------------------|-------|-------------|----------|
| response to abiotic stimulus                    | 15    | 9           | 4.95E-05 |
| response to endogenous stimulus                 | 26    | 11          | 3.88E-04 |
| response to hypoxia                             | 6     | 5           | 3.94E-04 |
| response to decreased oxygen levels             | 6     | 5           | 3.94E-04 |
| response to oxygen levels                       | 6     | 5           | 3.94E-04 |
| response to radiation                           | 4     | 4           | 5.30E-04 |
| response to organonitrogen compound             | 16    | 8           | 8.31E-04 |
| response to nitrogen compound                   | 16    | 8           | 8.31E-04 |
| cellular response to organic substance          | 33    | 12          | 1.06E-03 |
| cellular response to endogenous stimulus        | 18    | 8           | 2.24E-03 |
| Aging                                           | 11    | 6           | 2.55E-03 |
| response to organic substance                   | 49    | 14          | 5.65E-03 |
| cellular response to organonitrogen compound    | 9     | 5           | 5.79E-03 |
| response to peptide                             | 9     | 5           | 5.79E-03 |
| cellular response to nitrogen compound          | 9     | 5           | 5.79E-03 |
| response to ethanol                             | 6     | 4           | 6.27E-03 |
| response to organic cyclic compound             | 17    | 7           | 7.78E-03 |
| cellular response to oxygen-containing compound | 17    | 7           | 7.78E-03 |

Supplemental Table 23. Gene Ontology biological processes of protein downregulated in CM versus controls with uncomplicated malaria and no history of CM. Statistical significance was assessed using a one-sided hypergeometric test.

| Term for biological process                                                      | total | downregulated | p value  |
|----------------------------------------------------------------------------------|-------|---------------|----------|
| Chemotaxis                                                                       | 11    | 5             | 5.30E-04 |
| Taxis                                                                            | 11    | 5             | 5.30E-04 |
| cellular component disassembly                                                   | 8     | 4             | 1.50E-03 |
| cell chemotaxis                                                                  | 8     | 4             | 1.50E-03 |
| antimicrobial humoral immune response mediated by antimicrobial peptide          | 4     | 3             | 1.55E-03 |
| granulocyte chemotaxis                                                           | 5     | 3             | 3.70E-03 |
| granulocyte migration                                                            | 5     | 3             | 3.70E-03 |
| carbohydrate transport                                                           | 2     | 2             | 5.91E-03 |
| hexose transmembrane transport                                                   | 2     | 2             | 5.91E-03 |
| monosaccharide transmembrane transport                                           | 2     | 2             | 5.91E-03 |
| transforming growth factor beta1 production                                      | 2     | 2             | 5.91E-03 |
| regulation of transforming growth factor beta1 production                        | 2     | 2             | 5.91E-03 |
| positive regulation of transforming growth factor beta1 production               | 2     | 2             | 5.91E-03 |
| carbohydrate transmembrane transport                                             | 2     | 2             | 5.91E-03 |
| endothelial cell chemotaxis                                                      | 2     | 2             | 5.91E-03 |
| regulation of cysteine-type endopeptidase activity involved in apoptotic process | 2     | 2             | 5.91E-03 |
| chemokine-mediated signaling pathway                                             | 2     | 2             | 5.91E-03 |
| positive regulation of epithelial cell apoptotic process                         | 2     | 2             | 5.91E-03 |
| glucose transmembrane transport                                                  | 2     | 2             | 5.91E-03 |
| response to chemokine                                                            | 2     | 2             | 5.91E-03 |
| cellular response to chemokine                                                   | 2     | 2             | 5.91E-03 |
| regulation of cysteine-type endopeptidase activity                               | 2     | 2             | 5.91E-03 |
| regulation of endothelial cell chemotaxis                                        | 2     | 2             | 5.91E-03 |
| negative regulation of endothelial cell chemotaxis                               | 2     | 2             | 5.91E-03 |

Supplemental Table 24. Top 20 serum metabolites upregulated in CM versus uncomplicated malaria without history of CM. Statistical significance was assessed with a two-tailed paired t test, using an alpha level of 0.05, and false discovery rate was used for multiple testing adjustment.

| Name                                                                                                                      | LogFC | Adj p value |
|---------------------------------------------------------------------------------------------------------------------------|-------|-------------|
| 5-hydroxy-2,2,6,6-tetramethyl-4-{2-methyl-1-[2,4,6-trihydroxy-3-(2-methylpropanoyl)phenyl]propyl}cyclohex-4-ene-1,3-dione | 4.03  | 9.86E-04    |
| 3-Hydroxybutyric acid                                                                                                     | 2.54  | 1.42E-03    |
| Estradiol-17beta-glucuronide                                                                                              | 3.91  | 3.07E-03    |
| Cortisol                                                                                                                  | 1.59  | 3.61E-03    |
| Prostaglandin A2                                                                                                          | 3.43  | 4.17E-03    |
| Ethopabate                                                                                                                | 3.88  | 4.61E-03    |
| Formiminoglutamic Acid                                                                                                    | 4.64  | 4.61E-03    |
| 3-(3,4-Dihydroxyphenyl)-N-(3-oxopropyl)propanamide                                                                        | 2.38  | 4.76E-03    |
| 17(S)-HpDHA                                                                                                               | 3.20  | 4.92E-03    |
| Glyceraldehyde                                                                                                            | 0.48  | 5.25E-03    |
| D-Phenylalanine                                                                                                           | 0.94  | 5.25E-03    |
| beta-D-Glucopyranuronic acid                                                                                              | 2.09  | 5.25E-03    |
| trans-Cinnamic acid                                                                                                       | 1.14  | 5.29E-03    |
| Taurochenodeoxycholic acid                                                                                                | 2.92  | 5.37E-03    |
| alpha-Aminoadipic acid                                                                                                    | 2.24  | 5.78E-03    |
| N-{3-[(4-Acetamidobutyl)amino]propyl}acetamide                                                                            | 2.16  | 6.09E-03    |
| D-Ribofuranosylcreatine                                                                                                   | 2.86  | 6.09E-03    |
| Paracetamol                                                                                                               | 6.24  | 6.47E-03    |
| 3-(4-Methyl-3-pentenyl)thiophene                                                                                          | 1.04  | 6.50E-03    |
| Levulinic acid                                                                                                            | 1.48  | 7.72E-03    |

Supplemental Table 25. Serum metabolites downregulated in CM versus uncomplicated malaria without history of CM. Statistical significance was assessed with a two-tailed paired t test, using an alpha level of 0.05, and false discovery rate was used for multiple testing adjustment.

| Name                                                               | LogFC | Adj p value |
|--------------------------------------------------------------------|-------|-------------|
| 6-[(6-Aminohexanoyl)amino]hexanoic acid                            | -2.99 | 7.96E-03    |
| Linoleic Acid                                                      | -0.79 | 0.017       |
| Tetrahydro-2-furanylmethyl hydrogen sulfate                        | -0.5  | 0.021       |
| phe-ile                                                            | -2.22 | 0.025       |
| (2E,2'E)-N,N'-1,4-Butanediylbis[3-(3,4-dihydroxyphenyl)acrylamide] | -0.6  | 0.026       |
| L-(+)-Arginine                                                     | -1.04 | 0.038       |
| Oleic Acid                                                         | -0.57 | 0.045       |
| Allopurinol                                                        | -3.27 | 0.049       |

Supplemental Table 26. Pathway comparison of metabolites upregulated in CM compared to controls with uncomplicated malaria and no history of CM using MetaboAnalyst 5.0. Enrichment analyses interrogated the chemical structure sub-class category and pathway analyses were performed using the KEGG *Homo sapiens* pathway library and a two-tailed hypergeometric test.

|                                                      | Total | Expected | Hits | p        | Impact |
|------------------------------------------------------|-------|----------|------|----------|--------|
| Phenylalanine, tyrosine, and tryptophan biosynthesis | 4     | 0.12     | 2    | 4.77E-03 | 1      |
| Phenylalanine metabolism                             | 10    | 0.29     | 2    | 3.20E-02 | 0.36   |
| Lysine degradation                                   | 25    | 0.73     | 3    | 3.37E-02 | 0.14   |
| Alanine, aspartate, and glutamate metabolism         | 28    | 0.81     | 3    | 4.51E-02 | 0.05   |



Supplemental Table 27. Demographic data for comparisons between severe malaria subtypes and controls with a history of CM. \* denotes mean (standard deviation). Statistical significance assessed using a two-tailed t-test.

A. CM versus controls with a history of CM

|                                  | Cases             | Controls        | p value |
|----------------------------------|-------------------|-----------------|---------|
| n                                | 8                 | 8               |         |
| Female                           | 1                 | 1               |         |
| Age* (yrs)                       | 3.37 (0.92)       | 3.50 (0.93)     | 0.68    |
| Parasitemia* (parasite/ $\mu$ L) | 189,211 (188,830) | 37,837 (56,511) | 0.10    |
| BCS                              |                   |                 |         |
| 5                                | 0                 | 8               |         |
| 2                                | 5                 | 0               |         |
| 1                                | 3                 | 0               |         |
| Hgb* (g/dL)                      | 7.90 (1.80)       | 9.55 (1.43)     | 0.10    |

B. SMA versus controls with a history of CM

|                                  | Cases         | Controls      | p value  |
|----------------------------------|---------------|---------------|----------|
| n                                | 6             | 6             |          |
| Female                           | 5             | 5             |          |
| Age* (yrs)                       | 3.00 (1.26)   | 3.00 (1.26)   | 1        |
| Parasitemia* (parasite/ $\mu$ L) | 66800 (66173) | 60200 (86803) | 0.78     |
| BCS                              |               |               |          |
| 5                                | 4             | 6             |          |
| 4                                | 1             | 0             |          |
| 3                                | 1             | 0             |          |
| Hgb* (g/dL)                      | 3.35 (1.00)   | 9.45 (1.43)   | 5.27E-05 |

C. Concurrent CM and SMA versus controls with a history of CM

|                                  | Cases         | Controls    | p value |
|----------------------------------|---------------|-------------|---------|
| n                                | 4             | 4           |         |
| Female                           | 2             | 2           |         |
| Age* (yrs)                       | 3.75 (0.96)   | 3.75 (0.96) | 1       |
| Parasitemia* (parasite/ $\mu$ L) | 19287 (34975) | 3962 (6010) | 0.37    |
| BCS                              |               |             |         |
| 5                                | 0             | 4           |         |
| 2                                | 1             | 0           |         |
| 1                                | 3             | 0           |         |
| Hgb* (g/dL)                      | 2.97 (0.75)   | 8.77 (2.27) | 0.023   |

Supplemental Table 28. Top 20 transcripts with the most significant association from differential gene expression analyses between CM in comparison to controls with a history of CM. Significance of association was assessed with a quasi-likelihood F test based on the negative binomial distribution. False discovery rate was used to correct for multiple testing.

| Gene    | logFC | logCPM | p value  | FDR      |
|---------|-------|--------|----------|----------|
| IL1R2   | 4.13  | 9.07   | 2.15E-09 | 1.51E-05 |
| CD163   | 3.36  | 5.35   | 7.86E-08 | 2.77E-04 |
| FKBP5   | 2.18  | 7.86   | 3.55E-07 | 8.34E-04 |
| MCEMP1  | 2.75  | 6.32   | 5.04E-07 | 8.87E-04 |
| SAMSN1  | 2.60  | 6.66   | 1.07E-06 | 1.51E-03 |
| SOCS3   | 2.07  | 6.75   | 2.01E-06 | 2.23E-03 |
| TRABD2A | -1.82 | 7.02   | 2.22E-06 | 2.23E-03 |
| KCNE1   | 2.63  | 7.61   | 5.58E-06 | 4.39E-03 |
| SPATC1  | 2.97  | 4.79   | 5.61E-06 | 4.39E-03 |
| IL10    | 3.49  | 4.45   | 8.68E-06 | 6.12E-03 |
| ETS2    | 1.91  | 5.90   | 1.16E-05 | 7.09E-03 |
| AATBC   | -2.97 | 4.63   | 1.30E-05 | 7.09E-03 |
| MMP8    | 3.66  | 6.04   | 1.31E-05 | 7.09E-03 |
| TRIB1   | 2.78  | 5.06   | 2.14E-05 | 0.010    |
| CCR5AS  | 3.57  | 4.52   | 2.22E-05 | 0.010    |
| DAAM2   | 4.50  | 3.80   | 3.30E-05 | 0.014    |
| S100A12 | 2.31  | 9.91   | 3.35E-05 | 0.014    |
| BMX     | 2.76  | 4.52   | 3.90E-05 | 0.015    |
| PFKFB3  | 1.76  | 7.54   | 4.58E-05 | 0.016    |
| OLFM4   | 4.09  | 4.20   | 4.58E-05 | 0.016    |

Supplemental Table 29. Top 20 transcripts with the most significant association from differential gene expression analyses between concurrent CM and SMA in comparison to controls with a history of CM. Significance of association was assessed with a quasi-likelihood F test based on the negative binomial distribution. False discovery rate was used to correct for multiple testing.

| Gene    | logFC | logCPM | p value  | FDR      |
|---------|-------|--------|----------|----------|
| MPO     | 8.77  | 7.40   | 9.80E-09 | 3.52E-05 |
| IFI44L  | -6.49 | 6.08   | 9.61E-08 | 1.57E-04 |
| ELANE   | 9.93  | 6.41   | 1.31E-07 | 1.57E-04 |
| ISG15   | -4.34 | 7.30   | 4.37E-07 | 3.92E-04 |
| EDIL3   | 8.74  | 6.10   | 6.81E-07 | 4.89E-04 |
| IFIT1   | -5.32 | 5.80   | 9.02E-07 | 5.40E-04 |
| ZDHHC19 | 4.68  | 5.65   | 1.11E-06 | 5.71E-04 |
| OAS3    | -3.71 | 6.23   | 1.57E-06 | 7.04E-04 |
| IL1R2   | 4.34  | 8.21   | 2.18E-06 | 8.70E-04 |
| PRTN3   | 8.95  | 5.51   | 2.53E-06 | 9.07E-04 |
| CTSG    | 8.94  | 5.51   | 4.01E-06 | 1.31E-03 |
| MMP9    | 4.10  | 8.49   | 4.63E-06 | 1.38E-03 |
| RBFOX1  | 6.66  | 5.72   | 5.36E-06 | 1.48E-03 |
| IFIT3   | -3.39 | 7.10   | 6.49E-06 | 1.66E-03 |
| MMP8    | 5.40  | 5.11   | 1.07E-05 | 2.56E-03 |
| OLFM4   | 4.57  | 5.73   | 1.21E-05 | 2.71E-03 |
| BPI     | 4.60  | 5.87   | 1.37E-05 | 2.76E-03 |
| ARG1    | 3.48  | 5.94   | 1.43E-05 | 2.76E-03 |
| XAF1    | -3.16 | 6.87   | 1.46E-05 | 2.76E-03 |
| CD163   | 5.55  | 4.99   | 1.59E-05 | 2.86E-03 |

Supplemental Table 30. Statistical associations between deconvolution based cell proportions and case control status using a two-tailed t test.

| Cell type   | CM v<br>controls wo<br>history | SMA v<br>controls wo<br>history | Concurrent<br>v controls<br>wo history | CM v<br>controls w<br>history | SMA v<br>controls w<br>history | Concurrent v<br>controls w<br>history |
|-------------|--------------------------------|---------------------------------|----------------------------------------|-------------------------------|--------------------------------|---------------------------------------|
| B cells     | 0.53                           | 0.53                            | 0.56                                   | 0.77                          | 0.99                           | 0.44                                  |
| T cells     | 0.54                           | 0.051                           | 0.064                                  | 0.11                          | 0.0055                         | 0.16                                  |
| Neutrophils | 0.4                            | 0.44                            | 0.71                                   | 0.12                          | 0.22                           | 0.23                                  |

Supplemental Table 31. Top 20 transcripts with the most significant association from differential gene expression analyses comparing CM versus controls with uncomplicated disease without a history of CM. Analyses are adjusted for B cell, T cell, and neutrophil proportions. Significance of association was assessed with a quasi-likelihood F test based on the negative binomial distribution. False discovery rate was used to correct for multiple testing.

| Gene     | logFC | logCPM | p value  | FDR      |
|----------|-------|--------|----------|----------|
| IL1R2    | 3.97  | 8.73   | 3.47E-17 | 2.92E-13 |
| FKBP5    | 2.30  | 7.73   | 2.19E-11 | 9.19E-08 |
| CD163    | 4.05  | 5.50   | 3.47E-09 | 9.73E-06 |
| IL18R1   | 1.98  | 6.35   | 1.16E-08 | 2.31E-05 |
| KCNE1    | 1.94  | 7.43   | 1.37E-08 | 2.31E-05 |
| MMP8     | 3.45  | 5.11   | 1.78E-08 | 2.49E-05 |
| MMP9     | 1.95  | 7.79   | 1.30E-07 | 1.53E-04 |
| OLFM4    | 4.72  | 4.33   | 1.46E-07 | 1.53E-04 |
| LTF      | 2.90  | 4.84   | 3.00E-07 | 2.69E-04 |
| RBM33    | -1.43 | 8.29   | 3.20E-07 | 2.69E-04 |
| IL1R1    | 1.81  | 5.81   | 8.02E-07 | 6.13E-04 |
| ADARB1   | -1.30 | 7.17   | 9.19E-07 | 6.44E-04 |
| SPATC1   | 4.98  | 4.51   | 1.13E-06 | 7.32E-04 |
| DAAM2    | 3.73  | 4.06   | 1.79E-06 | 1.07E-03 |
| KMT2D    | -1.60 | 8.81   | 2.68E-06 | 1.50E-03 |
| RORC     | -2.45 | 5.22   | 3.08E-06 | 1.60E-03 |
| IGHV3-23 | 2.04  | 5.67   | 3.24E-06 | 1.60E-03 |
| IRAK3    | 1.26  | 8.01   | 3.56E-06 | 1.62E-03 |
| PPM1F    | -1.22 | 7.19   | 3.65E-06 | 1.62E-03 |
| ZDHHC20  | 1.59  | 6.02   | 4.55E-06 | 1.91E-03 |

Supplemental Table 32. Transcripts with significant association from differential gene expression analyses comparing SMA versus controls with uncomplicated disease without a history of CM. Analyses are adjusted for B cell, T cell, and neutrophil proportions. Significance of association was assessed with a quasi-likelihood F test based on the negative binomial distribution. False discovery rate was used to correct for multiple testing.

| Gene    | logFC  | logCPM | p value  | FDR      |
|---------|--------|--------|----------|----------|
| SLC6A19 | 21.44  | 7.67   | 4.05E-07 | 3.33E-03 |
| LTF     | 6.12   | 6.59   | 1.05E-06 | 4.33E-03 |
| LCN2    | 7.15   | 5.62   | 5.43E-06 | 0.015    |
| ARG1    | 3.23   | 6.24   | 7.41E-06 | 0.015    |
| ELANE   | 4.38   | 4.77   | 1.90E-05 | 0.031    |
| DEFA1   | 8.46   | 4.58   | 2.96E-05 | 0.035    |
| DAAM2   | 6.77   | 4.35   | 3.48E-05 | 0.035    |
| TUBB2A  | -18.52 | 4.40   | 3.75E-05 | 0.035    |
| THSD4   | 4.08   | 5.31   | 3.84E-05 | 0.035    |

Supplemental Table 33. Top 20 transcripts with the most significant association from differential gene expression analyses comparing concurrent CM and SMA versus controls with uncomplicated disease without a history of CM. Analyses are adjusted for B cell, T cell, and neutrophil proportions. Significance of association was assessed with a quasi-likelihood F test based on the negative binomial distribution. False discovery rate was used to correct for multiple testing.

| Gene   | logFC  | logCPM | p value  | FDR      |
|--------|--------|--------|----------|----------|
| PRKG1  | 11.01  | 6.00   | 3.35E-07 | 1.30E-03 |
| LY6E   | -3.27  | 7.54   | 4.14E-07 | 1.30E-03 |
| HSPA1A | 3.09   | 7.40   | 4.49E-06 | 9.39E-03 |
| ATP8B4 | 5.61   | 4.89   | 1.41E-05 | 0.019    |
| OLFM4  | 5.23   | 5.78   | 1.62E-05 | 0.019    |
| ISG15  | -3.52  | 5.95   | 1.79E-05 | 0.019    |
| OAS3   | -3.19  | 6.39   | 2.20E-05 | 0.020    |
| KMT2D  | -2.86  | 9.17   | 2.84E-05 | 0.022    |
| RBFOX1 | 10.25  | 5.46   | 3.17E-05 | 0.022    |
| ARID5B | 2.59   | 6.42   | 3.90E-05 | 0.024    |
| ELANE  | 4.41   | 6.42   | 4.81E-05 | 0.027    |
| FKBP5  | 2.45   | 7.65   | 5.25E-05 | 0.027    |
| OAS1   | -2.31  | 7.09   | 5.62E-05 | 0.027    |
| FRMPD3 | -7.51  | 5.84   | 6.51E-05 | 0.029    |
| DPP10  | 10.03  | 4.39   | 8.47E-05 | 0.035    |
| XAF1   | -2.38  | 7.44   | 9.96E-05 | 0.039    |
| RPL21  | -2.70  | 8.88   | 1.07E-04 | 0.040    |
| C4B    | -10.73 | 4.67   | 1.16E-04 | 0.040    |
| STAP1  | -3.71  | 6.01   | 1.38E-04 | 0.046    |
| PRTN3  | 8.35   | 5.52   | 1.48E-04 | 0.046    |

Supplemental Table 34. Transcripts with significant association from differential gene expression analyses comparing severe malaria subtypes versus controls with uncomplicated disease with a history of CM. Analyses are adjusted for B cell, T cell, and neutrophil proportions. Significance of association was assessed with a quasi-likelihood F test based on the negative binomial distribution. False discovery rate was used to correct for multiple testing.

A. Gene associated with cerebral malaria in comparison to controls with a history of CM

| Gene  | logFC | logCPM | p value  | FDR   |
|-------|-------|--------|----------|-------|
| DEFA4 | 8.07  | 5.49   | 1.82E-06 | 0.013 |

B. Top 20 genes associated with concurrent cerebral malaria and severe malarial anemia in comparison to controls with a history of CM

| Gene     | logFC | logCPM | p value  | FDR      |
|----------|-------|--------|----------|----------|
| SLC2A5   | 11.38 | 5.90   | 3.11E-10 | 1.12E-06 |
| MPO      | 9.13  | 7.42   | 5.06E-09 | 9.08E-06 |
| IL1R2    | 4.99  | 8.21   | 1.48E-07 | 1.77E-04 |
| IFI44L   | -6.24 | 6.10   | 5.48E-07 | 4.91E-04 |
| MMP9     | 4.47  | 8.49   | 9.68E-07 | 5.91E-04 |
| LTF      | 5.78  | 6.68   | 9.88E-07 | 5.91E-04 |
| EFTUD2   | 4.62  | 7.19   | 2.24E-06 | 1.15E-03 |
| DEFA4    | 4.89  | 8.34   | 2.94E-06 | 1.32E-03 |
| IFIT1    | -5.15 | 5.78   | 4.03E-06 | 1.61E-03 |
| ISG15    | -3.90 | 7.29   | 5.14E-06 | 1.84E-03 |
| OLFM4    | 6.30  | 5.76   | 6.09E-06 | 1.99E-03 |
| ZDHHC19  | 4.99  | 5.65   | 7.41E-06 | 2.22E-03 |
| ELANE    | 11.10 | 6.44   | 8.23E-06 | 2.27E-03 |
| BPI      | 5.35  | 5.90   | 1.42E-05 | 3.65E-03 |
| OAS3     | -3.54 | 6.22   | 1.83E-05 | 4.19E-03 |
| IGHV3-23 | 4.54  | 5.65   | 1.87E-05 | 4.19E-03 |
| HMGB2    | 3.32  | 8.38   | 2.25E-05 | 4.74E-03 |
| GOLPH3   | 3.43  | 7.30   | 2.74E-05 | 5.46E-03 |
| APOL6    | -3.66 | 6.11   | 4.08E-05 | 7.01E-03 |
| ANP32E   | 4.20  | 6.41   | 4.08E-05 | 7.01E-03 |



Supplemental Table 35. Probes remaining after quality control

| Comparison              | Number of probes passing QC |
|-------------------------|-----------------------------|
| CM vs Co w/o hx         | 8403                        |
| CM vs Co w/ hx          | 7047                        |
| SMA vs Co w/o hx        | 8219                        |
| SMA vs Co w/ hx         | 7233                        |
| Concurrent vs Co w/o hx | 6269                        |
| Concurrent vs Co w/ hx  | 3590                        |
| Co w/ hx vs Co w/o hx   | 7532                        |
| CM vs SMA               | 6373                        |
| CM vs Concurrent        | 6822                        |
| SMA vs Concurrent       | 6155                        |

Supplemental Table 36. Gene Ontology biological processes with the strongest associations when comparing gene expression between malaria subtypes and uncomplicated malaria controls with a history of CM. Statistical significance was assessed using a one-sided hypergeometric test. P values were adjusted for multiple testing using the Benjamini-Hochberg method.

A) Cerebral malaria versus uncomplicated controls with a history of cerebral malaria, data corresponds to Supplemental Figure 4A

| Term for biological process                             | Gene Ratio | Adjusted p value |
|---------------------------------------------------------|------------|------------------|
| Response to hydrogen peroxide                           | 8/66       | 3.39E-05         |
| Cellular response to hydrogen peroxide                  | 7/66       | 3.39E-05         |
| Cellular response to reactive oxygen species            | 8/66       | 3.39E-05         |
| Response to reactive oxygen species                     | 9/66       | 3.39E-05         |
| Cellular response to oxidative stress                   | 9/66       | 2.44E-04         |
| Negative regulation of phosphorylation                  | 10/66      | 2.54E-04         |
| Cellular response to chemical stress                    | 9/66       | 4.74E-04         |
| Negative regulation of protein phosphorylation          | 9/66       | 4.74E-04         |
| Regulation of DNA-binding transcription factor activity | 10/66      | 4.74E-04         |
| Negative regulation of phosphate metabolic process      | 10/66      | 4.74E-04         |

B) Concurrent cerebral malaria and severe malarial anemia versus uncomplicated controls with a history of cerebral malaria, data corresponds to Supplemental Figure 4B

| Term for biological process                        | Gene Ratio | Adjusted p value |
|----------------------------------------------------|------------|------------------|
| Response to virus                                  | 17/65      | 7.04E-12         |
| Defense response to virus                          | 14/65      | 1.35E-10         |
| Defense response to symbiont                       | 14/65      | 1.35E-10         |
| Response to type I interferon                      | 8/65       | 7.77E-09         |
| Regulation of cytokine-mediated signaling pathway  | 10/65      | 2.42E-08         |
| Negative regulation of innate immune response      | 8/65       | 2.42E-08         |
| Negative regulation of response to biotic stimulus | 9/65       | 2.42E-08         |
| Regulation of response to cytokine stimulus        | 10/65      | 3.64E-08         |
| Cellular response to type I interferon             | 7/65       | 7.89E-08         |
| Negative regulation of viral genome replication    | 7/65       | 1.22E-07         |

Sample R code for transcriptomic analyses:

```
setwd("C:/Workingdirectory/")
Counts <- read.delim("ExpressionData.txt", comment.char="#")
head(Counts)
library(edgeR)
y <- DGEList(counts=Counts[,2:25], genes=Counts[,1])
Group <- factor(c(1,1,2,2,3,3,4,4,5,5,6,6,7,7,8,8,9,9,10,10,11,11,12,12))
Treatment <-
factor(c("Control","Severe","Control","Severe","Control","Severe","Control","Severe","Control","S
evere","Control","Severe","Control","Severe","Control","Severe","Control","Severe","Control","Se
vere","Control","Severe","Control","Severe"))
data.frame(Sample=colnames(y),Group,Treatment)
design <- model.matrix(~Group+Treatment)
rownames(design) <- colnames(y)
design
keep <- filterByExpr(y, design)
table(keep)
keep
y <- y[keep, , keep.lib.sizes=FALSE]
nrow(y)
y <- calcNormFactors(y)
y$samples
plotMDS(y, col=rep(1:2, gen=1:12))
y <- estimateDisp(y, design, robust=TRUE)
fit <- glmQLFit(y, design, robust=TRUE)
plotQLDisp(fit)
qlf <- glmQLFTest(fit)
topTags(qlf)
summary(decideTests(qlf))
plotMD(qlf)
o <- order(qlf$table$PValue)
cpm <- cpm(y)[o[1:405],]
sigdiff <- topTags(qlf, n=405)
library(gplots)
hits<-data.frame(sigdiff)
tophits<-hits$genes
tophits[tophits==""]<-NA
tophitstrimmed<-na.omit(tophits)
row.names(logcpm)<-Counts$GeneID
final<-logcpm[tophitstrimmed, ]
final.z<-t(apply(final, 1, scale))
final20<-head(tophitstrimmed, n=20)
final20top<-logcpm[final20, ]
final20.z<-t(apply(final20top, 1, scale))
final20topm<-data.matrix(final20.z)
heatmap(final20topm)
heatmap.2(final20topm, Colv=NA, scale="none", col=bluered(100), trace="none",
density.info="none", symm=T, symkey=F, symbreaks=T)
```

## Supplemental Note 2

### Data Access Instructions

#### Project:

A shared inflammatory signature across severe malaria syndromes in transcriptomic, proteomic, and metabolomic analyses

#### Metabolomics Data

Data Repository: MassIVE

Dataset ID: MSV000096913

#### url:

<https://massive.ucsd.edu/ProteoSAFe/dataset.jsp?task=ba8df9f0096c4bf6abb946f323f153c1>

Made public: 03/25/2025

#### Proteomics Data

Data repository: Pride

Dataset ID: PXD058621

url: <https://www.ebi.ac.uk/pride/archive/projects/PXD058621>

Project accession: PXD058621

Release Date: 03/25/2025

#### Transcriptomic data:

Data repository: GEO

Dataset ID: GSE289197

Reviewer access details: GSE289197

url: <https://www.ncbi.nlm.nih.gov/geo/query/acc.cgi?acc=GSE289197>

Release Date: 03/25/2025
